# Supplementary material for: Hydrogen-Bonded and Halogen-Bonded: Orthogonal Interactions for the Chloride Anion of a Pyrazolium Salt
Source: MDPI journal article supplement (doi:10.3390/molecules26133982), 2021-06-29
Supplement: s1 [file s1]

# Supplementary Materials: Hydrogen-Bonded and Halogen-Bonded: Orthogonal Interactions for the Chloride Anion of a Pyrazolium Salt

Steven van Terwingen<sup>1</sup>, Daniel Br  x<sup>1</sup>, Ruimin Wang<sup>1</sup> and Ulli Englert<sup>1,2,\*</sup>

## 1. Powder Diffractograms

Simulated powder patterns refer to the temperature of the single-crystal measurement (100 K), corresponding to a smaller unit cell and thus to larger  $2\theta$  in reciprocal space. This results in a slight systematic shift between experimental and simulated diffraction patterns.

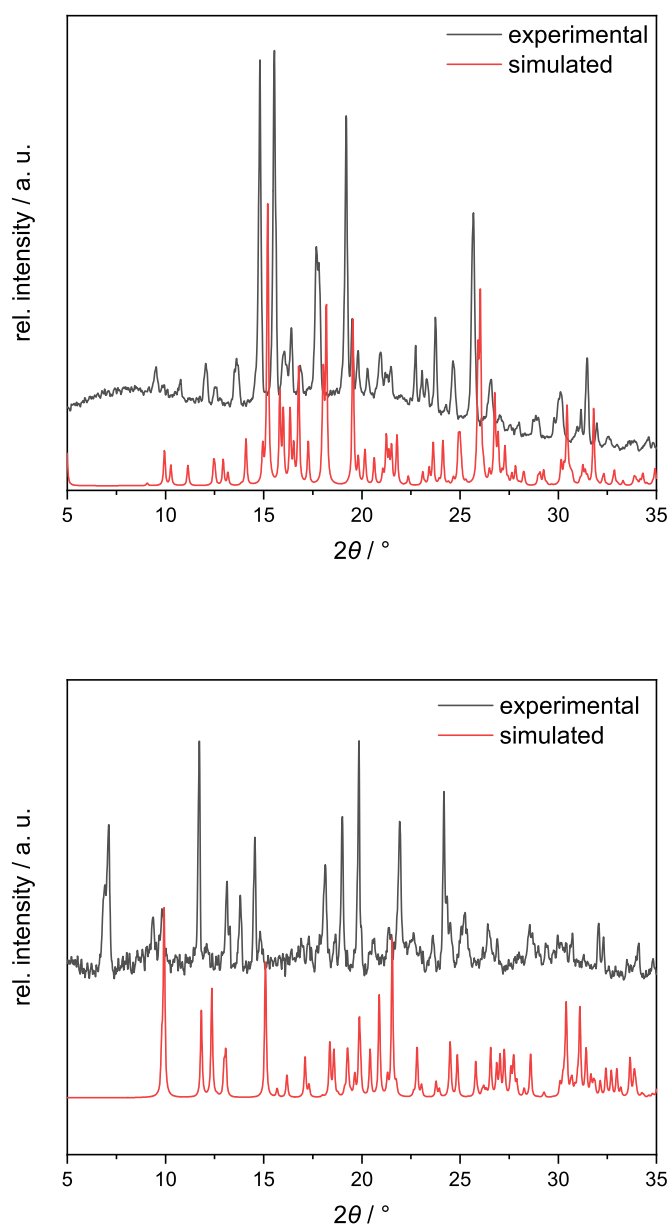

**Figure S1.** Simulated and experimental powder patterns of **1** (top) and **2** (bottom).

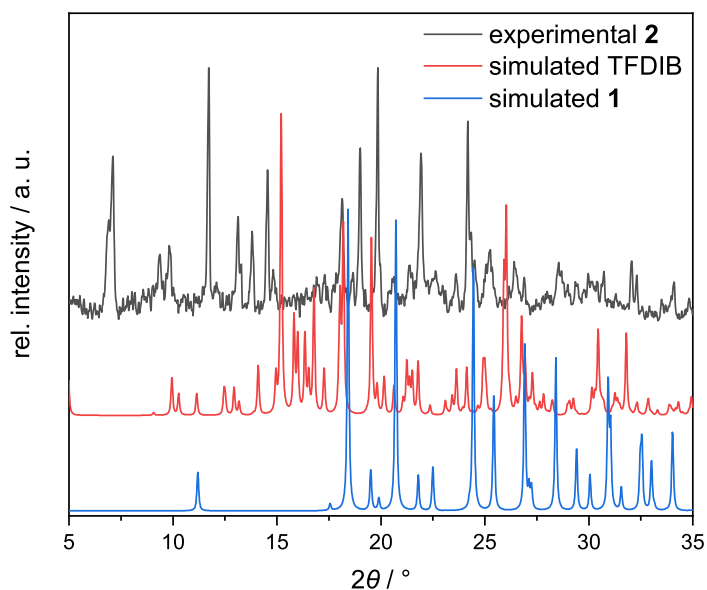

**Figure S2.** Experimental powder patterns of **2** and simulated patterns of **1** and TFDIB [1].

## 2. Crystal Data and Refinement Results

**Table S1.** Crystal data and refinement results for SCXRD data for **1** and **2** measured at  $T = 100$  K.

| Compound                                                   | <b>1</b>                                         | <b>2</b>                                                                                         |
|------------------------------------------------------------|--------------------------------------------------|--------------------------------------------------------------------------------------------------|
| Moiety formula                                             | $\text{C}_{16}\text{H}_{18}\text{N}_2\text{O}_2$ | $\text{C}_{16}\text{H}_{19}\text{N}_2\text{O}_2, 0.5(\text{C}_6\text{F}_4\text{I}_2), \text{Cl}$ |
| Formula weight / $\text{g mol}^{-1}$                       | 270.32                                           | 507.71                                                                                           |
| Crystal habit                                              | colorless plate                                  | colorless block                                                                                  |
| Crystal size / $\text{mm}^3$                               | $0.63 \times 0.34 \times 0.08$                   | $0.20 \times 0.16 \times 0.12$                                                                   |
| Crystal system                                             | orthorhombic                                     | monoclinic                                                                                       |
| Space group (No.)                                          | $Pbca$ (61)                                      | $P2_1/c$ (14)                                                                                    |
| $a$ / Å                                                    | 11.651(2)                                        | 10.963(3)                                                                                        |
| $b$ / Å                                                    | 13.671(3)                                        | 10.240(3)                                                                                        |
| $c$ / Å                                                    | 35.540(6)                                        | 18.038(5)                                                                                        |
| $\beta$ / °                                                | 90                                               | 93.269(6)                                                                                        |
| $V$ / Å <sup>3</sup>                                       | 5660.5(18)                                       | 2021.8(10)                                                                                       |
| $Z$                                                        | 16                                               | 4                                                                                                |
| $D_{\text{calc}}$ / $\text{g cm}^{-3}$                     | 1.269                                            | 1.668                                                                                            |
| $\mu$ / $\text{mm}^{-1}$                                   | 0.085                                            | 1.750                                                                                            |
| $\sin(\theta_{\text{max}}) / \lambda$ / Å <sup>-1</sup>    | 0.60                                             | 0.83                                                                                             |
| total/unique refl.                                         | 45107/5168                                       | 114651/9541                                                                                      |
| observed refl.                                             | 3741                                             | 6927                                                                                             |
| No. of parameters                                          | 375                                              | 254                                                                                              |
| $R_{\text{int}}$                                           | 0.0953                                           | 0.1275                                                                                           |
| $R_1(I > 2\sigma(I))$                                      | 0.0410                                           | 0.0406                                                                                           |
| $wR_2$ (all data)                                          | 0.1044                                           | 0.0871                                                                                           |
| $S$ (all data)                                             | 1.031                                            | 1.041                                                                                            |
| $\rho_{\text{min}}/\rho_{\text{max}}$ / $e \text{ Å}^{-3}$ | -0.257/0.265                                     | -0.675/0.765                                                                                     |
| CCDC #                                                     | 2086575                                          | 2086574                                                                                          |

## 3. NMR Spectra

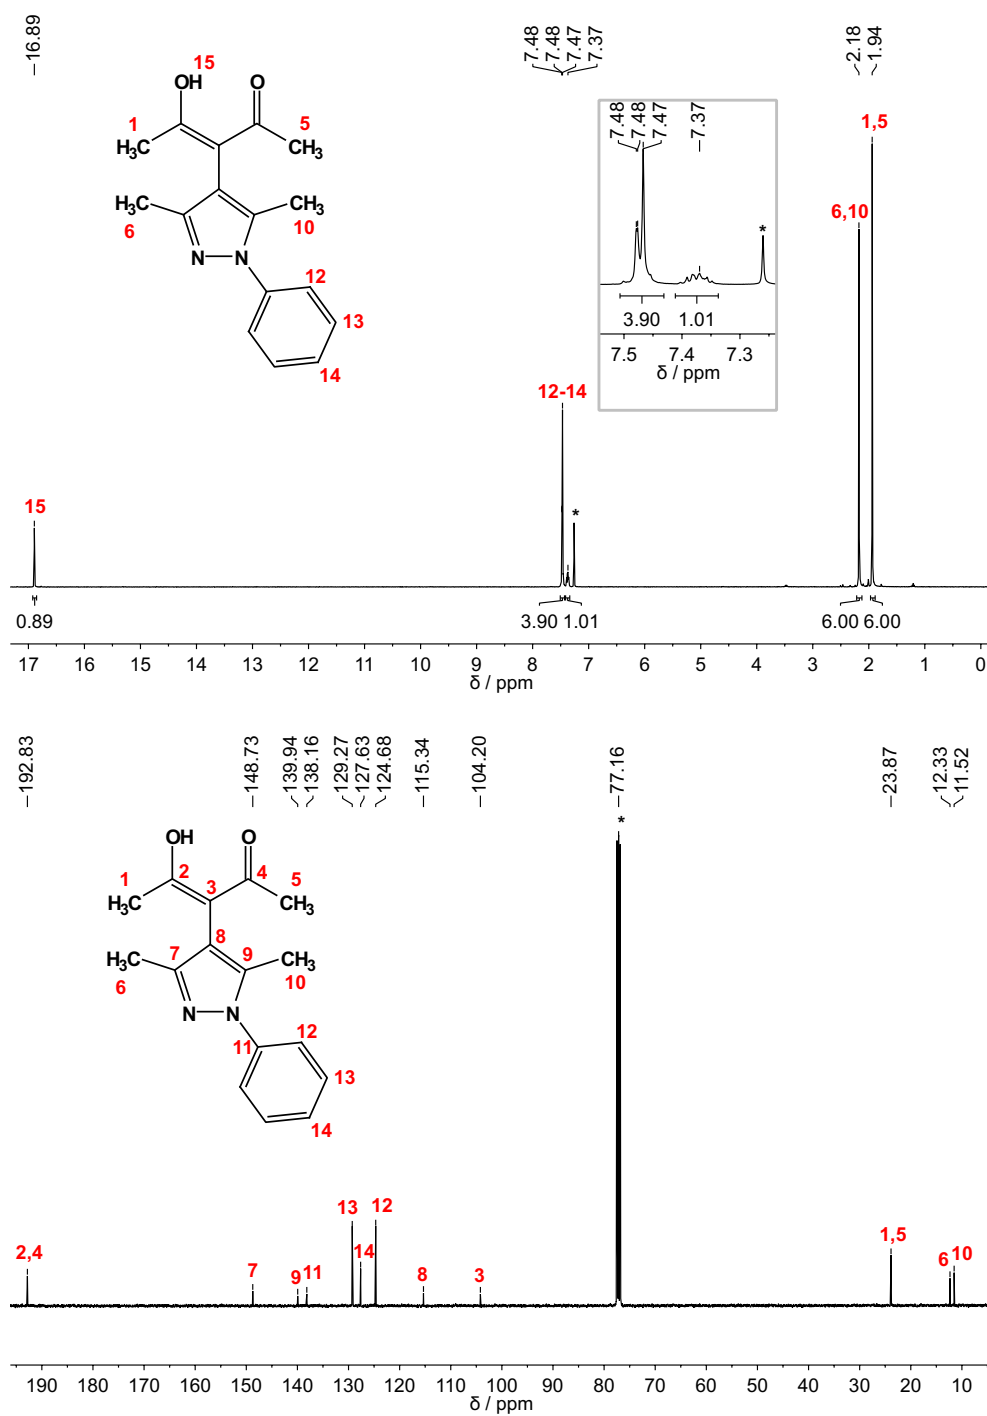

**Figure S3.**  $^1\text{H}$  (top) and  $^{13}\text{C}\{^1\text{H}\}$  (bottom) NMR spectra of **1** measured in  $\text{CDCl}_3$  (\*) at room temperature.

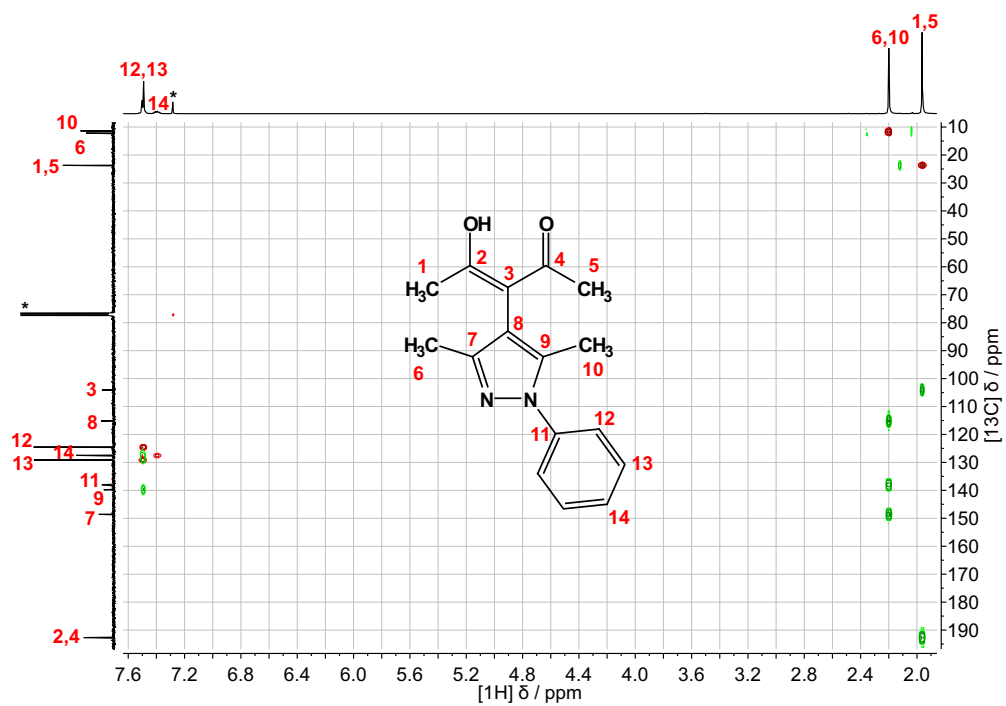

**Figure S4.** HSQC (red) and HMBC (green) NMR spectra of **1** measured in  $\text{CDCl}_3$  (\*) at room temperature.

#### 4. Computational Details

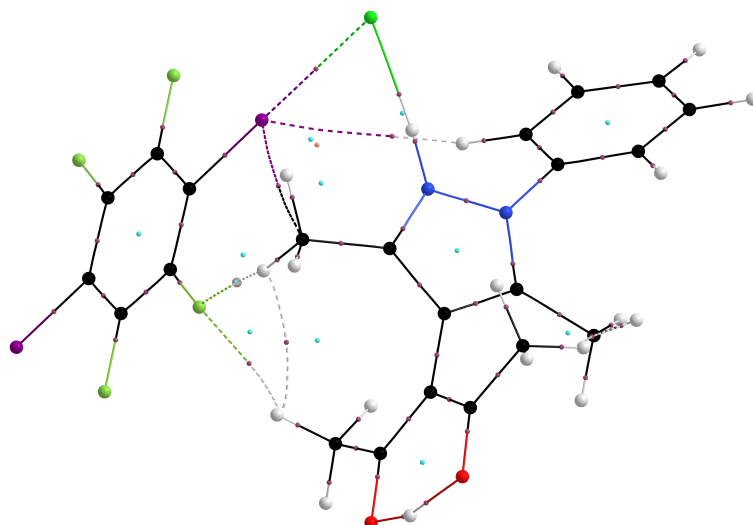

**Figure S5.** Structure fragment used for the single point calculation discussed in the main text, section 2.2.

**Table S2.** Topological properties of interactions at their bond critical point (3, −1) of **2**.

| Bond      | $\rho / e \text{ \AA}^{-3}$ | $\nabla^2 \rho / e \text{ \AA}^{-5}$ | bond path / $\text{\AA}$ | $G / \text{a.u.}$ | $G/\rho / \text{a.u.}$ | $V / \text{a.u.}$ | $E / \text{a.u.}$ |
|-----------|-----------------------------|--------------------------------------|--------------------------|-------------------|------------------------|-------------------|-------------------|
| I1...C11  | 0.129                       | 1.184                                | 3.1654                   | 0.0110            | 0.58                   | −0.0097           | 0.0123            |
| Cl1...H1N | 0.321                       | 1.785                                | 2.0680                   | 0.0300            | 0.63                   | −0.0415           | −0.0115           |
| I1-C1     | 0.808                       | 1.403                                | 2.0902                   | 0.0740            | 0.62                   | −0.1333           | −0.0594           |
| N1-H1N    | 2.043                       | −54.371                              | 1.0109                   | 0.0471            | 0.16                   | −0.6582           | −0.6111           |
| C17-C18   | 2.066                       | −23.823                              | 1.3892                   | 0.1106            | 0.36                   | −0.4683           | −0.3577           |
| N1-N2     | 2.477                       | −23.328                              | 1.3603                   | 0.1790            | 0.49                   | −0.5999           | −0.4209           |
| N1-C7     | 2.051                       | 4.135                                | 1.3359                   | 0.3981            | 1.31                   | −0.7532           | −0.3552           |
| N2-C9     | 1.642                       | −2.498                               | 1.4352                   | 0.2310            | 0.95                   | −0.4879           | −0.2569           |
| F1-C17    | 1.672                       | 6.365                                | 1.3501                   | 0.3505            | 1.41                   | −0.6349           | −0.2844           |
| O1-H1     | 1.957                       | −56.928                              | 0.9975                   | 0.0740            | 0.26                   | −0.7385           | −0.6645           |
| O2...H1   | 0.607                       | 3.338                                | 1.5687                   | 0.0662            | 0.74                   | −0.0977           | −0.0315           |
| O1-C2     | 2.099                       | 8.129                                | 1.2970                   | 0.4452            | 1.43                   | −0.8061           | −0.3609           |
| O2-C4     | 2.207                       | 5.954                                | 1.2842                   | 0.4522            | 1.38                   | −0.8426           | −0.3904           |
| C3-C8     | 1.706                       | −17.040                              | 1.4790                   | 0.0736            | 0.29                   | −0.3240           | −0.2504           |
| C9-C10    | 1.685                       | −16.762                              | 1.4863                   | 0.0741            | 0.30                   | −0.3220           | −0.2479           |
| C3-C4     | 1.964                       | −22.066                              | 1.4181                   | 0.0964            | 0.33                   | −0.4216           | −0.3253           |
| C13-C14   | 2.067                       | −24.967                              | 1.3895                   | 0.1006            | 0.33                   | −0.4602           | −0.3596           |

#### References

1. Chaplot, S.L.; McIntyre, G.J.; Mierzejewski, A.; Pawley, G.S. The High-Temperature Phase of 1,2,4,5-Tetrafluoro-3,6-diiodobenzene and the Phase Transition. *Acta Crystallogr.* **1981**, *B37*, 2210–2214. doi:10.1107/S0567740881008406.
